# Supplementary material
Source: Springer Nature journal article supplement (https://www.springermedizin.de/resource/supplementary/12960_2010_228_MOESM2_ESM.pdf/9570688)

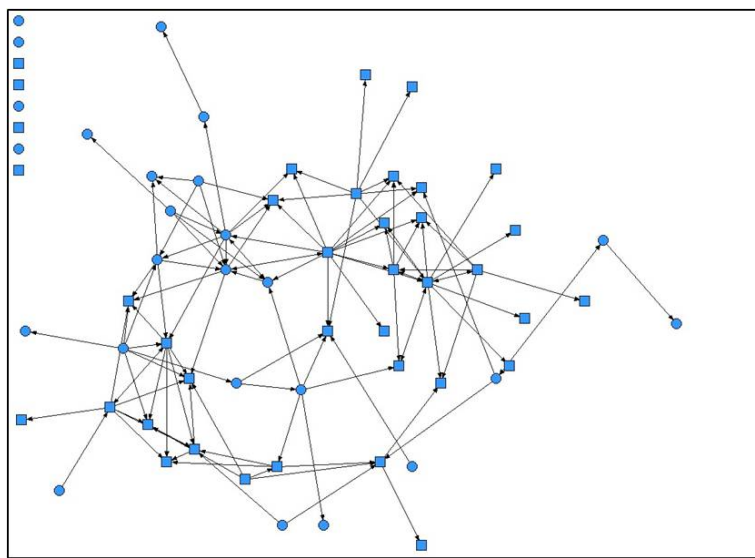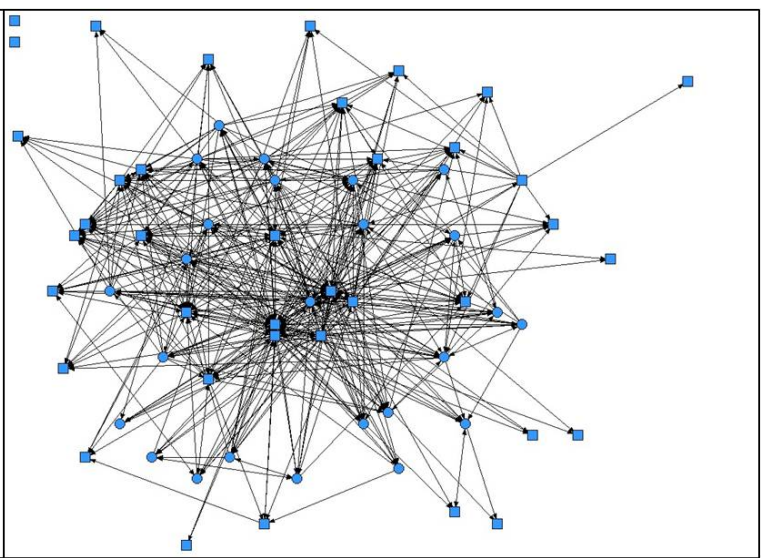

Supplement: MOESM2 [file 9570688]
